# Supplementary material for: Enhancing the photocatalytic activity of defective titania for carbon dioxide photoreduction via surface functionalization
Source: Royal Society of Chemistry journal article supplement (doi:10.1039/d1cy01606g), 2021-11-23
Supplement: d1cy01606g1.pdf [file d1cy01606g1.pdf]

## Electronic Supporting Information

### Enhancing photocatalytic activity of defective titania for carbon dioxide photoreduction *via* surface-functionalization

Lina Zhang, Qianyu Zhao, Lu Shen, Qiuye Li,\* Taifeng Liu, Lili Hou and Jianjun Yang\*

National & Local Joint Engineering Research Center for Applied Technology of Hybrid  
Nanomaterials, Henan University, Kaifeng 475004, China.

\*To whom correspondence should be addressed, E-mail: [qiuyeli@henu.edu.cn](mailto:qiuyeli@henu.edu.cn),

[yangjianjun@henu.edu.cn](mailto:yangjianjun@henu.edu.cn)

#### Experimental Section

**CO<sub>2</sub> adsorption tests:** Before the CO<sub>2</sub> adsorption tests, all samples were degassed at 120 °C for 12 h. The adsorption volume of CO<sub>2</sub> is set as 0.1% CO<sub>2</sub> versus 1 mL of standard gas, which corresponds to approximately 0.3 MPa in the digital pressure gauge. The competitive adsorption tests of CO<sub>2</sub> and H<sub>2</sub>O were carried out in a homemade reactor. First, the to-be-tested sample was degassed at room temperature under vacuum for 30 min. At the end of degassing, 1 mL of the CO<sub>2</sub> standard gas was injected into the homemade reactor. Then 5 mL of H<sub>2</sub>O was injected into the reactor to achieve solubility equilibrium for 1 h. Finally, the gas mixture of CO<sub>2</sub> and H<sub>2</sub>O was monitored in the container. After 1 h of adsorption equilibrium, the gas mixture was extracted and quantified by gas chromatography.

**Characterization:** The photocatalytic decomposition of water to yield hydrogen was analyzed by gas phase chromatograph (GC-2018C; SHIMADZU, China) equipped with a thermal conductivity detector (TCD).

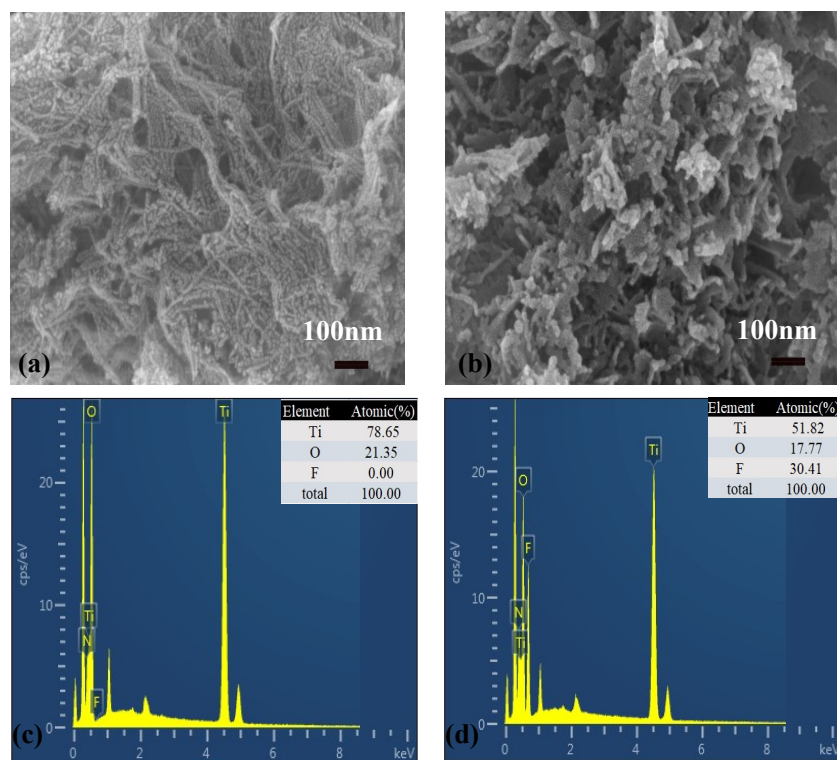

Fig. S1 SEM and EDS images of (a, c) TiO<sub>2</sub>-SBO, (b, d) F-TiO<sub>2</sub>-SBO-3.

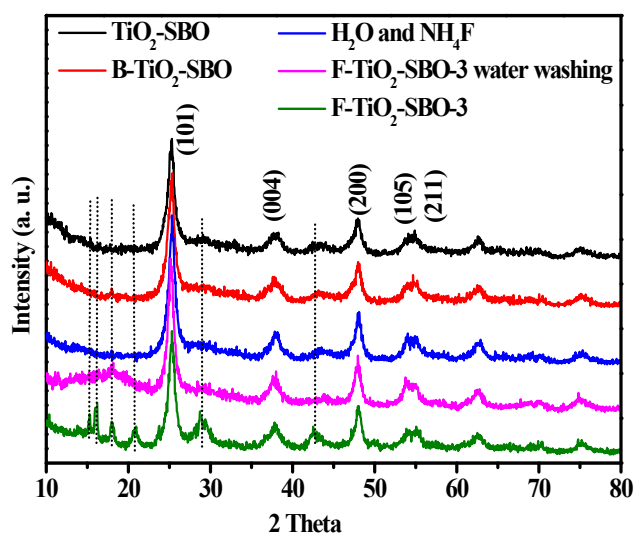

Fig. S2 XRD patterns of the prepared samples.

In order to prove that TiO<sub>2</sub>-SBO has new XRD impurity peaks after fluorination, we conducted the comparative experiments. The B-TiO<sub>2</sub>-SBO sample was prepared in the same way as F-TiO<sub>2</sub>-SBO-3, except that only IPA was added and without NH<sub>4</sub>F

during the preparation process; The preparation process of the water and  $\text{NH}_4\text{F}$  sample was the same as that of F-TiO<sub>2</sub>-SBO-3, but the H<sub>2</sub>O replaces IPA solvent; The F-TiO<sub>2</sub>-SBO-3 water washing catalyst was washed with distilled water for several times; In Fig. S2, two new XRD diffraction peaks of 17.98° and 42.57° were appeared on the sample of B-TiO<sub>2</sub>-SBO, and this indicated that the adsorption of IPA solvent on the surface of the catalyst, which was difficult to completely remove, would affect the XRD diffraction peaks on TiO<sub>2</sub>-SBO. No new diffraction peaks appeared when the water aqueous was the solvent. However, the co-existence of IPA and  $\text{NH}_4\text{F}$  would appeared XRD peak signals at 15.19°, 16.06°, 17.98°, 21.05°, 28.65°, 42.57° and the as-washed sample showed no changes in the crystal structure of the defective TiO<sub>2</sub>. In other words, the new XRD peaks should be derived from the residual  $\text{NH}_4\text{F}$  and IPA that can hardly be completely removed by washing with water, and the dispersion of non-metal elements was not incompletely uniform, which contributed to small changes in the crystal of defective TiO<sub>2</sub>.

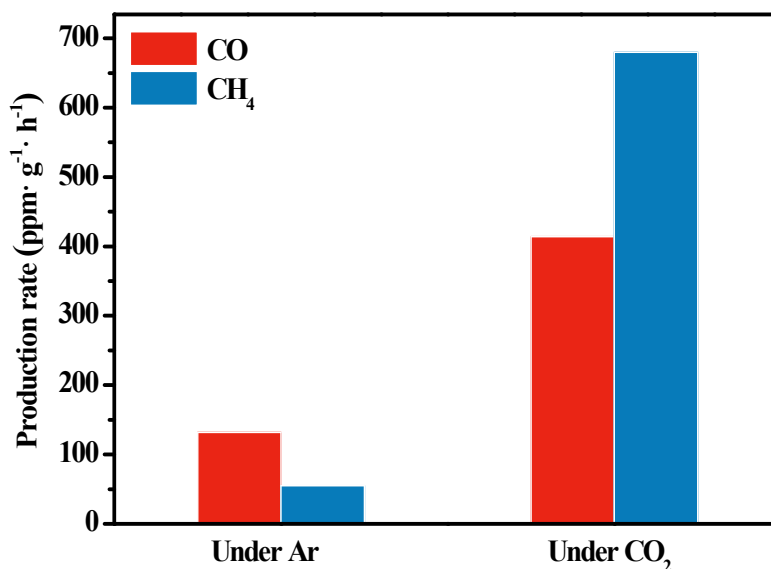

Fig. S3 Photocatalytic reduction of CO<sub>2</sub> under Ar and CO<sub>2</sub>.

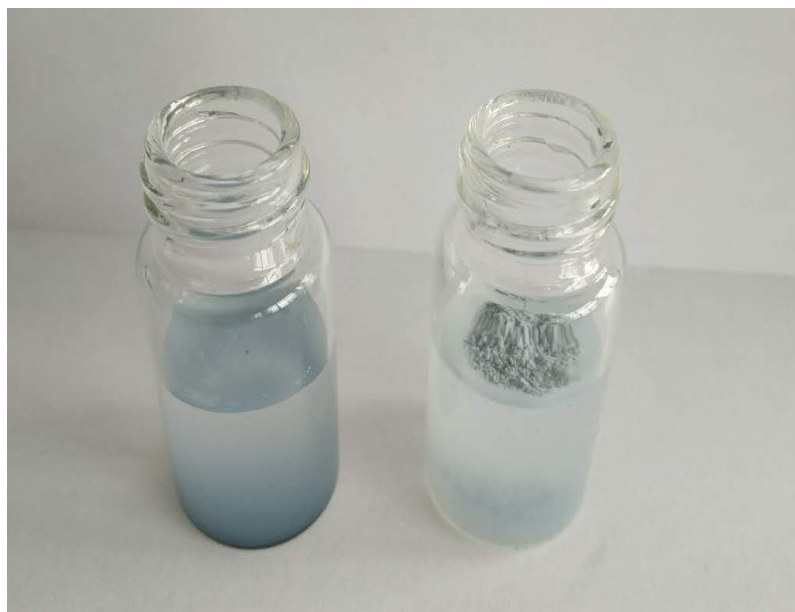

Fig. S4 The optical diagram of  $\text{TiO}_2\text{-SBO}$  and  $\text{F-TiO}_2\text{-SBO-3}$  samples dispersed in water.

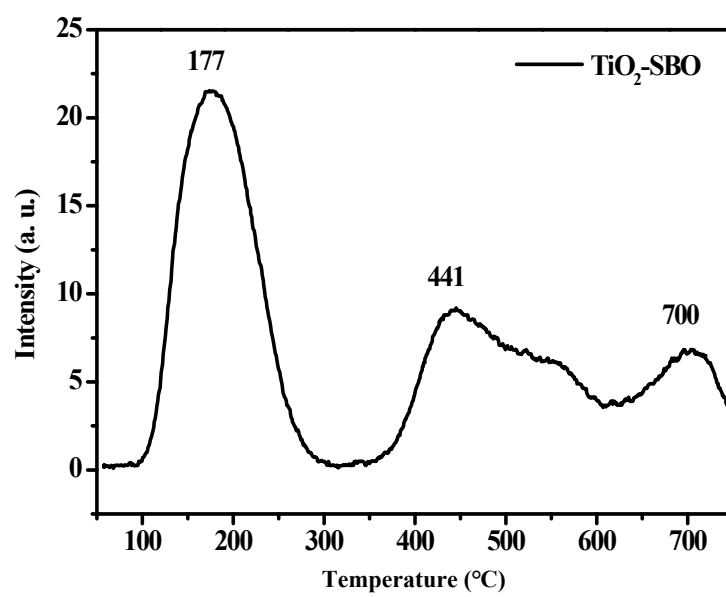

Fig. S5  $\text{CO}_2$ -TPD diagram of  $\text{TiO}_2\text{-SBO}$ .

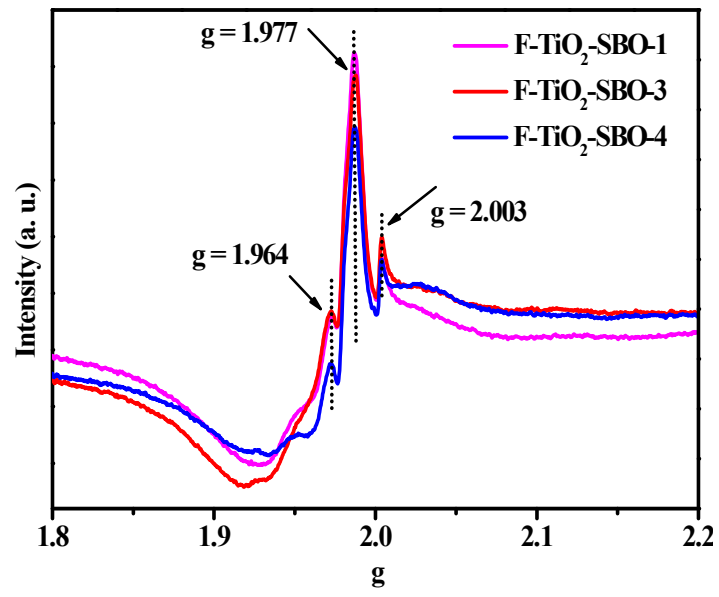

Fig. S6 ESR spectra of the TiO<sub>2</sub>-SBO-1, F-TiO<sub>2</sub>-SBO-3 and F-TiO<sub>2</sub>-SBO-4.

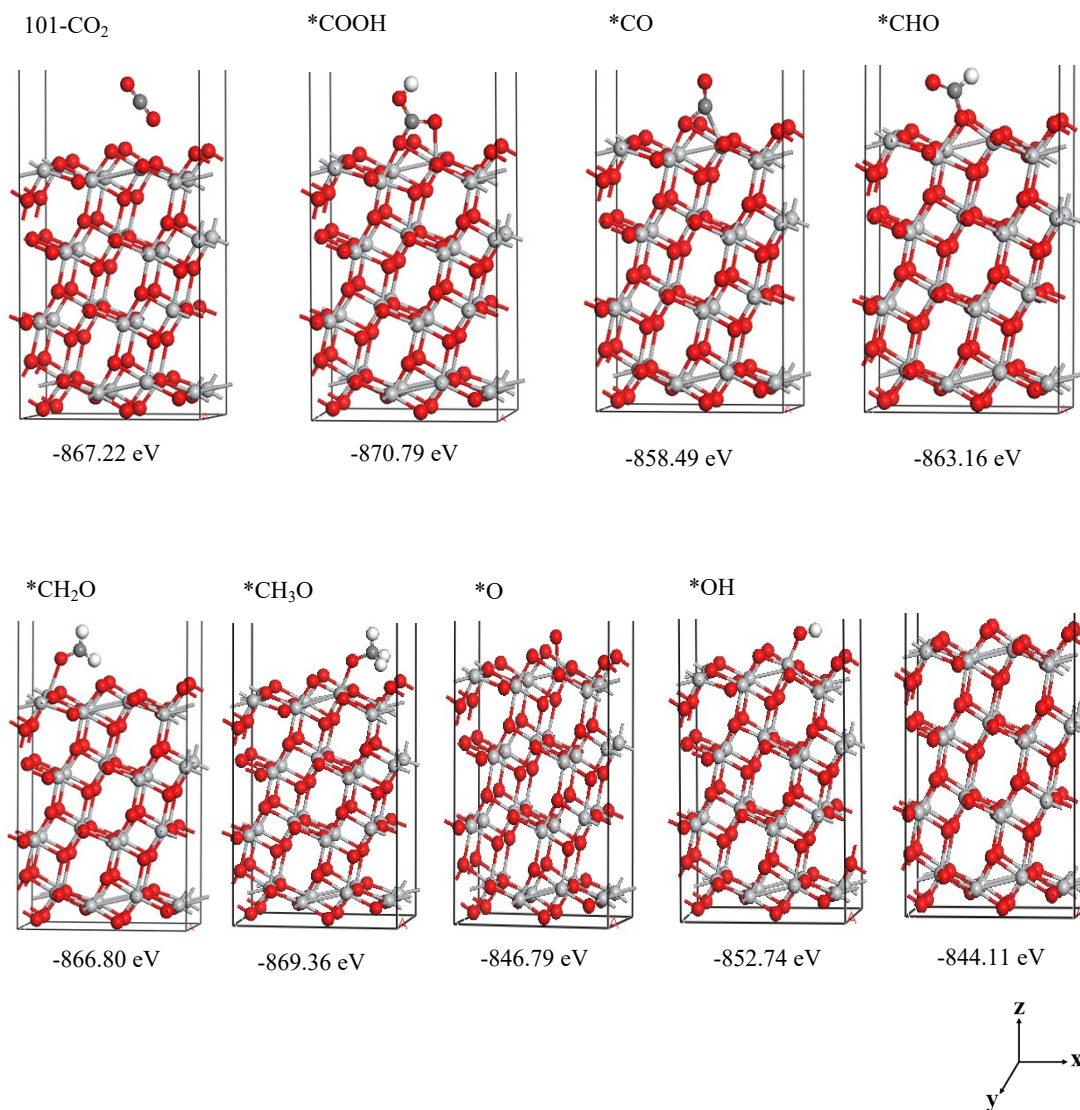

Fig. S7 Geometries of intermediates of CO<sub>2</sub> reduction on clean anatase (101). Red, gray, dark gray, white are O atoms, Ti atoms, C atoms and H atoms. (\*) represents surface.

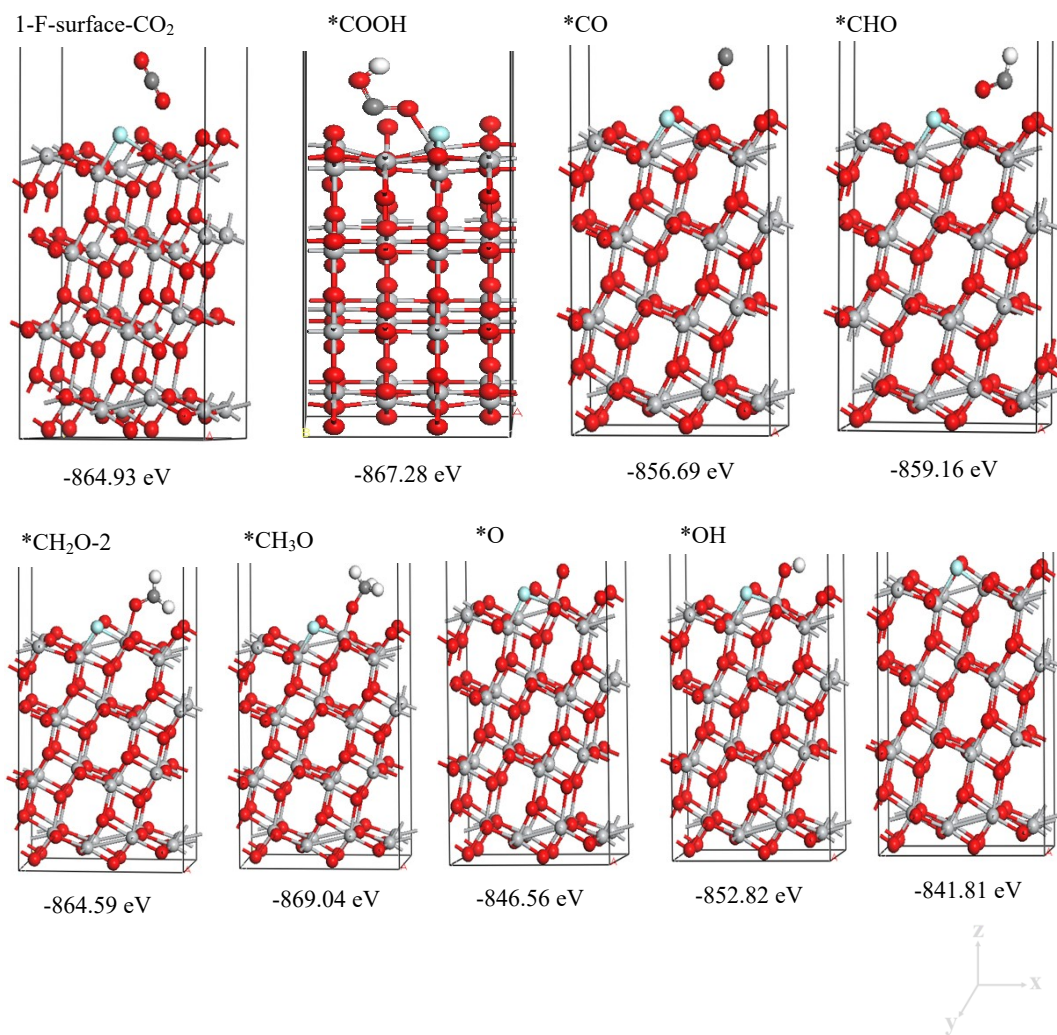

Fig. S8 Geometries of intermediates of CO<sub>2</sub> reduction on F doped anatase (101). Red, gray, dark gray, white, wathet are O atoms, Ti atoms, C atoms, H atoms and F atoms. (\*) represents surface.

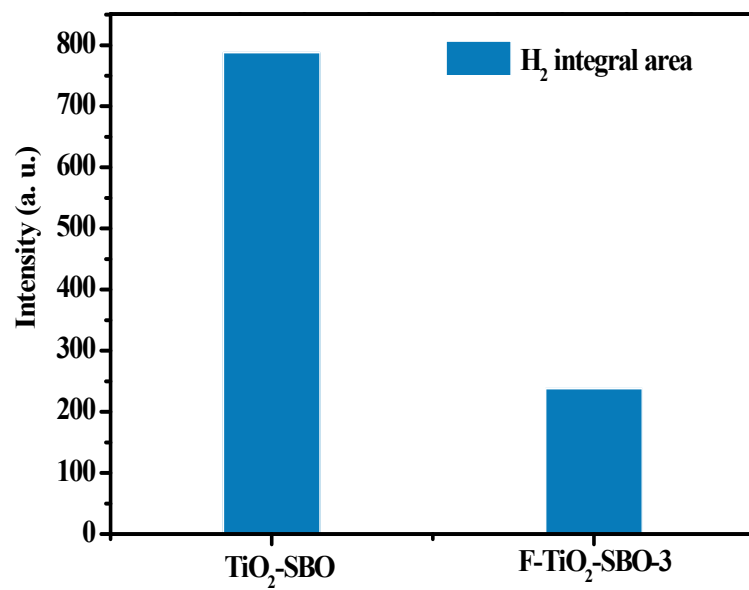

Fig. S9 H<sub>2</sub> integral area of TiO<sub>2</sub>-SBO and F-TiO<sub>2</sub>-SBO-3.
